# Supplementary material
Source: PubMed Central journal article supplement (PMC6463562)
Supplement: DB171087SupplementaryData.pdf [file DB171087SupplementaryData.pdf]

SUPPLEMENTARY DATA

**Supplementary Figure S1.** Chromatographic profiles of FAHFAs. Epididymal adipose tissue samples were extracted and separated on YMC-Triart C18 ExRS 1.9  $\mu$ m 2.1x150 mm column. Illustrative profiles for HAA and HDHA regioisomers were acquired from mice fed omega-3 PUFA rich diet (1; 2). PA, palmitic acid; PO, palmitoleic acid; SA, stearic acid; OA, oleic acid; LA, linoleic acid; AA, arachidonic acid; DHA, docosahexaenoic acid; H- prefix denotes hydroxy fatty acid.

In case of HPO and HOA, limited information on the position of double bond was acquired based on the MS/MS/MS spectra. Supposed configuration: 9-HPO and 9-HOA:  $\Delta^{10}$ ; 10-HPO and 10-HOA:  $\Delta^8$ ; 11-, 12-HPO and 11-, 12-HOA:  $\Delta^9$ ;

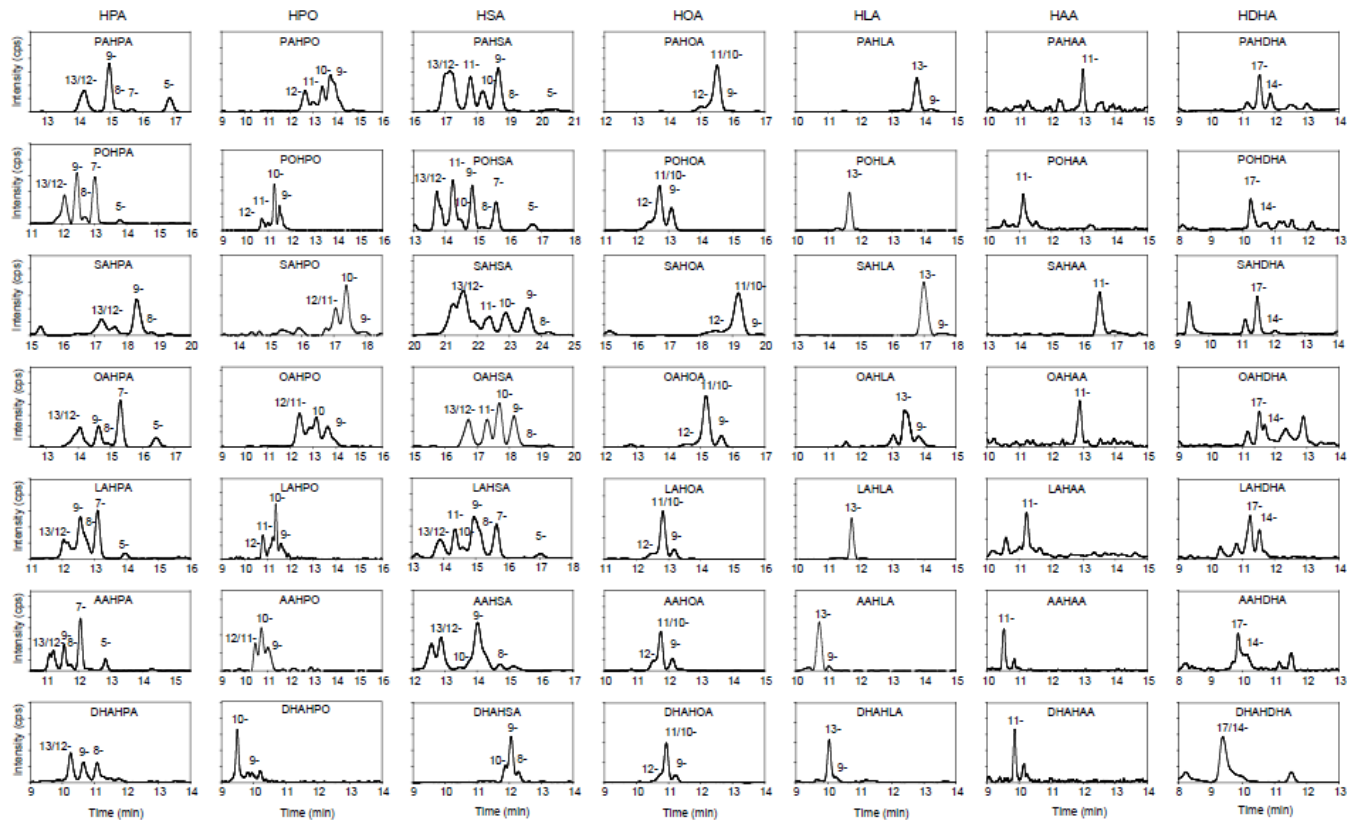

## SUPPLEMENTARY DATA

**Supplementary Figure S2.** Correlations between 9-PAHSA trait and physiological parameters of the BXH/HXB RI strains. Difference between maximal and basal glucose uptake into collagenase-liberated adipocytes and isoproterenol-induced lipolysis of isolated adipocytes plotted versus 9-PAHSA trait levels. Physiological data acquired from GeneNetwork (3).

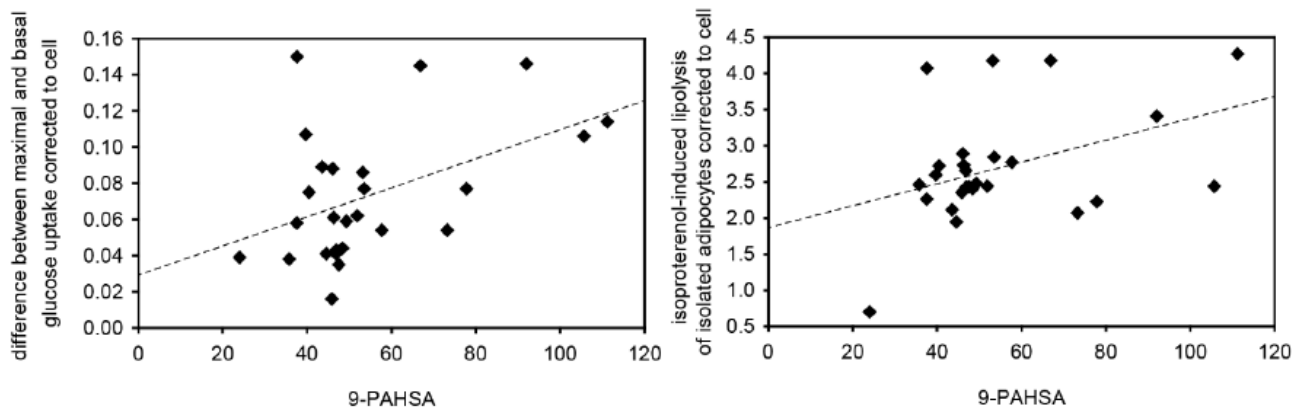

# SUPPLEMENTARY DATA

## Supplementary Figure S3. Manhattan plots of FAHFA traits

Dash line defines FDR threshold.

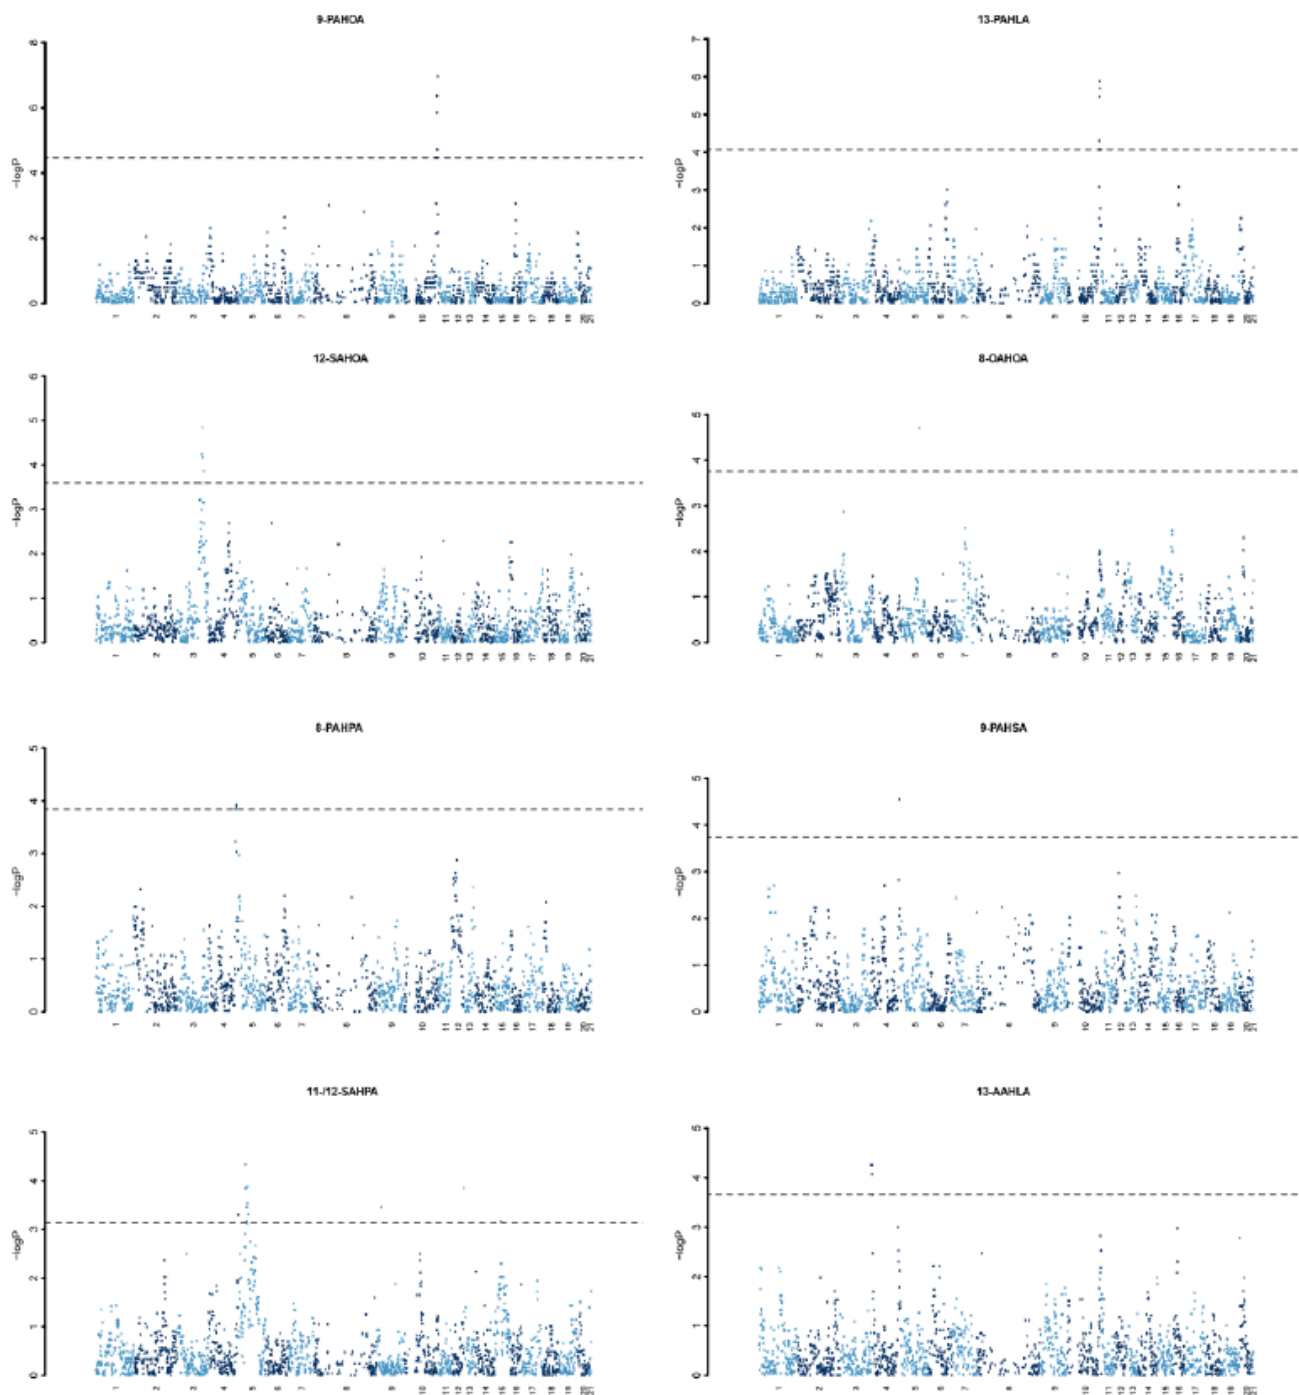

## SUPPLEMENTARY DATA

**Supplementary Figure S4.** Lipid peroxidation in wild type and Prdx6 null WAT. Levels of thiobarbituric acid reactive substances (TBARS) and 8-isoprostanes in WAT dissected from wild type and Prdx6 null mice. Data are expressed as means  $\pm$  standard error, n=3.

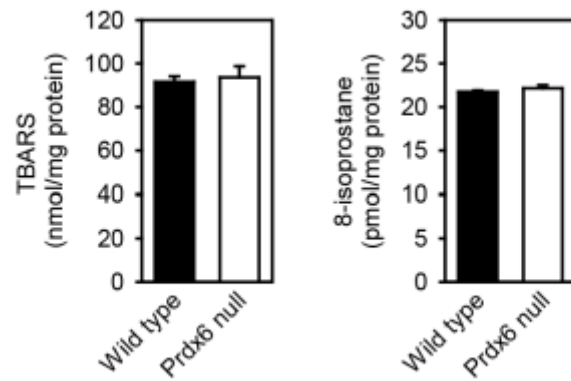

**Supplementary Table S1.** Optimized MS parameters for FAHFA measurement

Q1, precursor ion; Q3 product ion; DP, declustering potential; CE, collision energy.

| ID     | Q1 [M-H] <sup>-</sup> | Q3 FA | Q3 HFA | Q3 HFA-H <sub>2</sub> O | DP   | CE  |
|--------|-----------------------|-------|--------|-------------------------|------|-----|
| PAHPO  | 507.4                 | 255.2 | 269.2  | 251.2                   | -130 | -35 |
| PAHPA  | 509.4                 | 255.2 | 271.2  | 253.2                   | -130 | -35 |
| PAHLA  | 533.4                 | 255.2 | 295.2  | 277.2                   | -130 | -35 |
| PAHOA  | 535.4                 | 255.2 | 297.2  | 279.2                   | -130 | -35 |
| PAHSA  | 537.5                 | 255.2 | 299.3  | 281.3                   | -130 | -35 |
| PAHAA  | 557.4                 | 255.2 | 319.2  | 301.2                   | -130 | -35 |
| PAHDHA | 581.4                 | 255.2 | 343.2  | 325.2                   | -130 | -35 |
| POHPO  | 505.4                 | 253.2 | 269.2  | 251.2                   | -130 | -35 |
| POHPA  | 507.4                 | 253.2 | 271.2  | 253.2                   | -130 | -35 |
| POHLA  | 531.4                 | 253.2 | 295.2  | 277.2                   | -130 | -35 |
| POHOA  | 533.4                 | 253.2 | 297.2  | 279.2                   | -130 | -35 |
| POHSA  | 535.5                 | 253.2 | 299.3  | 281.3                   | -130 | -35 |
| POHAA  | 555.4                 | 253.2 | 319.2  | 301.2                   | -130 | -35 |
| POHDHA | 579.4                 | 253.2 | 343.2  | 325.2                   | -130 | -35 |
| LAHPO  | 531.4                 | 279.2 | 269.2  | 251.2                   | -130 | -35 |
| LAHPA  | 533.4                 | 279.2 | 271.2  | 253.2                   | -130 | -35 |
| LAHLA  | 557.4                 | 279.2 | 295.2  | 277.2                   | -130 | -35 |
| LAHOA  | 559.4                 | 279.2 | 297.2  | 279.2                   | -130 | -35 |
| LAHSA  | 561.5                 | 279.2 | 299.3  | 281.3                   | -130 | -35 |
| LAHAA  | 581.4                 | 279.2 | 319.2  | 301.2                   | -130 | -35 |
| LAHDHA | 605.4                 | 279.2 | 343.2  | 325.2                   | -130 | -35 |
| OAHPO  | 533.4                 | 281.2 | 269.2  | 251.2                   | -130 | -35 |
| OAHPA  | 535.4                 | 281.2 | 271.2  | 253.2                   | -130 | -35 |
| OAHLA  | 559.4                 | 281.2 | 295.2  | 277.2                   | -130 | -35 |
| OAHOA  | 561.4                 | 281.2 | 297.2  | 279.2                   | -130 | -35 |
| OAHSA  | 563.5                 | 281.2 | 299.3  | 281.3                   | -130 | -35 |
| OAHAA  | 583.4                 | 281.2 | 319.2  | 301.2                   | -130 | -35 |
| OAHDHA | 607.4                 | 281.2 | 343.2  | 325.2                   | -130 | -35 |
| SAHPO  | 535.5                 | 283.3 | 269.2  | 251.2                   | 130  | 35  |
| SAHPA  | 537.5                 | 283.3 | 271.2  | 253.2                   | -130 | -35 |
| SAHLA  | 561.5                 | 283.3 | 295.2  | 277.2                   | -130 | -35 |
| SAHOA  | 563.5                 | 283.3 | 297.2  | 279.2                   | -130 | -35 |
| SAHSA  | 565.6                 | 283.3 | 299.3  | 281.3                   | -130 | -35 |
| SAHAA  | 585.5                 | 283.3 | 319.2  | 301.2                   | -130 | -35 |
| SAHDHA | 609.5                 | 283.3 | 343.2  | 325.2                   | -130 | -35 |
| AAHPO  | 555.4                 | 303.2 | 269.2  | 251.2                   | -130 | -35 |
| AAHPA  | 557.4                 | 303.2 | 271.2  | 253.2                   | -130 | -35 |
| AAHLA  | 581.4                 | 303.2 | 295.2  | 277.2                   | -130 | -35 |

## SUPPLEMENTARY DATA

|         |       |       |       |       |      |     |
|---------|-------|-------|-------|-------|------|-----|
| AAHOA   | 583.5 | 303.2 | 297.2 | 279.2 | -130 | -35 |
| AAHSA   | 585.5 | 303.2 | 299.3 | 281.3 | -130 | -35 |
| AAHAA   | 605.4 | 303.2 | 319.2 | 301.2 | -130 | -35 |
| AAHDHA  | 629.4 | 303.2 | 343.2 | 325.2 | -130 | -35 |
| DHAHPO  | 579.4 | 327.2 | 269.2 | 251.2 | -130 | -35 |
| DHAHPA  | 581.4 | 327.2 | 271.2 | 253.2 | -130 | -35 |
| DHAHLA  | 605.4 | 327.2 | 295.2 | 277.2 | -130 | -35 |
| DHAHOA  | 607.5 | 327.2 | 297.2 | 279.2 | -130 | -35 |
| DHAHSA  | 609.5 | 327.2 | 299.3 | 281.3 | -130 | -35 |
| DHAHAA  | 629.4 | 327.2 | 319.2 | 301.2 | -130 | -35 |
| DHAHDHA | 653.4 | 327.2 | 343.2 | 325.2 | -130 | -35 |

SUPPLEMENTARY DATA

**Supplementary Table S2.** QTL associated with FAHFA traits

| SDP              | Trait        | Genomic Range          | p.value  | FDR         | beta         | t.stat       | beta_se     | ci_upper     | ci_lower     |
|------------------|--------------|------------------------|----------|-------------|--------------|--------------|-------------|--------------|--------------|
| SDPG_04161793548 | X9.PAHSA     | 4-161793548-161793548  | 2.79E-05 | 0.046932635 | -0.183081616 | -5.07118007  | 0.036102369 | -0.112320972 | -0.25384226  |
| SDPG_13071646655 | X12.13.PAHSA | 13-71646655-72510384   | 7.86E-05 | 0.044160896 | 0.25459247   | 4.678066316  | 0.054422587 | 0.36126074   | 0.1479242    |
| SDPG_13078909101 | X12.13.PAHSA | 13-78909101-78909101   | 2.27E-05 | 0.019103329 | 0.257097403  | 5.149244016  | 0.049929155 | 0.354958547  | 0.159236259  |
| SDPG_13080093944 | X12.13.PAHSA | 13-80093944-81219060   | 2.27E-05 | 0.019103329 | 0.257097403  | 5.149244016  | 0.049929155 | 0.354958547  | 0.159236259  |
| SDPG_13081943244 | X12.13.PAHSA | 13-81943244-83733914   | 1.16E-04 | 0.048985049 | 0.242172951  | 4.529814791  | 0.053461998 | 0.346958468  | 0.137387434  |
| SDPG_13083744138 | X12.13.PAHSA | 13-83744138-85418436   | 1.72E-04 | 0.057951633 | 0.24095815   | 4.381403448  | 0.054995654 | 0.348749632  | 0.133166667  |
| SDPG_04159937580 | X8.PAHPA     | 4-159937580-160514422  | 1.44E-04 | 0.081157675 | 0.387286553  | 4.447458398  | 0.087080422 | 0.557964179  | 0.216608926  |
| SDPG_04161793548 | X8.PAHPA     | 4-161793548-161793548  | 1.28E-04 | 0.081157675 | 0.30195506   | 4.49200988   | 0.06722048  | 0.4337072    | 0.170202919  |
| SDPG_04166069314 | X8.PAHPA     | 4-166069314-167152491  | 1.21E-04 | 0.081157675 | 0.40117426   | 4.515841485  | 0.0888371   | 0.575294975  | 0.227053545  |
| SDPG_10104672318 | X9.PAHOA     | 10-104672318-104732023 | 3.46E-05 | 0.011661292 | 0.244878086  | 4.988902974  | 0.049084556 | 0.341083816  | 0.148672357  |
| SDPG_10105504952 | X9.PAHOA     | 10-105504952-105761650 | 1.42E-06 | 0.000797405 | 0.281542166  | 6.214339228  | 0.045305246 | 0.370340448  | 0.192743885  |
| SDPG_10105769352 | X9.PAHOA     | 10-105769352-105964319 | 4.28E-07 | 0.000360233 | 0.289369192  | 6.688007016  | 0.043266879 | 0.374172276  | 0.204566109  |
| SDPG_10105969527 | X9.PAHOA     | 10-105969527-106177758 | 1.92E-05 | 0.008071153 | 0.274516729  | 5.213220194  | 0.052657804 | 0.377726025  | 0.171307432  |
| SDPG_10106181521 | X9.PAHOA     | 10-106181521-107689156 | 1.09E-07 | 0.000184418 | 0.336331521  | 7.238509846  | 0.046464193 | 0.42740134   | 0.245261702  |
| SDPG_10104672318 | X13.PAHLA    | 10-104672318-104732023 | 4.93E-05 | 0.020777125 | -0.227127602 | -4.854631121 | 0.046785759 | -0.135427514 | -0.318827689 |
| SDPG_10105504952 | X13.PAHLA    | 10-105504952-105761650 | 3.35E-06 | 0.001880199 | -0.258848927 | -5.881068008 | 0.044013932 | -0.17258162  | -0.345116233 |
| SDPG_10105769352 | X13.PAHLA    | 10-105769352-105964319 | 1.35E-06 | 0.001752817 | -0.264971881 | -6.234736055 | 0.042499294 | -0.181673265 | -0.348270498 |
| SDPG_10105969527 | X13.PAHLA    | 10-105969527-106177758 | 8.42E-05 | 0.028374352 | -0.243465606 | -4.652136987 | 0.052334144 | -0.140890684 | -0.346040527 |
| SDPG_10106181521 | X13.PAHLA    | 10-106181521-107689156 | 2.08E-06 | 0.001752817 | -0.296235071 | -6.065372674 | 0.048840374 | -0.200507937 | -0.391962204 |
| SDPG_05130556071 | X8.OAHOA     | 5-130556071-130556071  | 2.01E-05 | 0.033818481 | -0.35202829  | -5.195582126 | 0.067755312 | -0.219227878 | -0.484828703 |
| SDPG_04181531098 | X11.12.SAHPA | 4-181531098-181531098  | 4.95E-04 | 0.083348954 | 0.255805118  | 3.978345573  | 0.064299371 | 0.381831885  | 0.129778351  |
| SDPG_05049742388 | X11.12.SAHPA | 5-49742388-50644238    | 1.42E-04 | 0.059882138 | -0.324853563 | -4.453654472 | 0.0729409   | -0.1818894   | -0.467817726 |
| SDPG_05050656645 | X11.12.SAHPA | 5-50656645-52311164    | 4.62E-05 | 0.059882138 | -0.345957452 | -4.879582271 | 0.070898989 | -0.206995433 | -0.484919471 |
| SDPG_05052356181 | X11.12.SAHPA | 5-52356181-54231285    | 1.42E-04 | 0.059882138 | -0.324853563 | -4.453654472 | 0.0729409   | -0.1818894   | -0.467817726 |
| SDPG_05054244647 | X11.12.SAHPA | 5-54244647-54612807    | 6.90E-04 | 0.088995984 | -0.294528395 | -3.850330577 | 0.076494314 | -0.14459954  | -0.44445725  |
| SDPG_05054633806 | X11.12.SAHPA | 5-54633806-54986141    | 3.42E-04 | 0.072021144 | -0.307947307 | -4.119700264 | 0.07474993  | -0.161437444 | -0.45445717  |
| SDPG_05055867111 | X11.12.SAHPA | 5-55867111-57175062    | 3.42E-04 | 0.072021144 | -0.307947307 | -4.119700264 | 0.07474993  | -0.161437444 | -0.45445717  |
| SDPG_05057202014 | X11.12.SAHPA | 5-57202014-60139253    | 6.90E-04 | 0.088995984 | -0.294528395 | -3.850330577 | 0.076494314 | -0.14459954  | -0.44445725  |
| SDPG_05060214465 | X11.12.SAHPA | 5-60214465-60938429    | 3.42E-04 | 0.072021144 | -0.307947307 | -4.119700264 | 0.07474993  | -0.161437444 | -0.45445717  |
| SDPG_05060988192 | X11.12.SAHPA | 5-60988192-62843226    | 7.39E-04 | 0.088995984 | -0.29625819  | -3.823565808 | 0.077482174 | -0.144393129 | -0.44812325  |

SUPPLEMENTARY DATA

|                  |              |                       |          |             |              |              |             |              |              |
|------------------|--------------|-----------------------|----------|-------------|--------------|--------------|-------------|--------------|--------------|
| SDPG_05063114762 | X11.12.SAHPA | 5-63114762-63162152   | 1.32E-04 | 0.059882138 | -0.323527813 | -4.482585576 | 0.072174375 | -0.182066038 | -0.464989589 |
| SDPG_05063164285 | X11.12.SAHPA | 5-63164285-63706439   | 2.89E-04 | 0.072021144 | -0.310029409 | -4.183880452 | 0.074100924 | -0.164791597 | -0.455267221 |
| SDPG_05065239187 | X11.12.SAHPA | 5-65239187-66480071   | 4.80E-04 | 0.083348954 | -0.3019751   | -3.990091407 | 0.075681249 | -0.153639853 | -0.450310347 |
| SDPG_15025754773 | X11.12.SAHPA | 15-25754773-26250248  | 6.84E-04 | 0.088995984 | 0.315493383  | 3.853577938  | 0.081870248 | 0.475959069  | 0.155027696  |
| SDPG_03136383584 | X12.SAHOA    | 3-136383584-136578961 | 2.54E-04 | 0.085539159 | -0.220889599 | -4.233348851 | 0.052178454 | -0.118619829 | -0.323159369 |
| SDPG_03137777747 | X12.SAHOA    | 3-137777747-139087656 | 5.88E-05 | 0.037890575 | -0.232240547 | -4.788105941 | 0.048503636 | -0.137173421 | -0.327307674 |
| SDPG_03139108660 | X12.SAHOA    | 3-139108660-150071378 | 1.43E-05 | 0.024072631 | -0.249758886 | -5.324873544 | 0.046904191 | -0.157826672 | -0.341691101 |
| SDPG_03150844988 | X12.SAHOA    | 3-150844988-151580802 | 6.75E-05 | 0.037890575 | -0.241448801 | -4.73605112  | 0.050981038 | -0.141525967 | -0.341371636 |
| SDPG_03154833237 | X12.SAHOA    | 3-154833237-155286618 | 1.41E-04 | 0.059311448 | -0.22758677  | -4.457286849 | 0.051059485 | -0.12751018  | -0.32766336  |
| SDPG_04000102881 | X13.AAHLA    | 4-102881-7774756      | 5.59E-05 | 0.046549713 | 0.547352104  | 4.807520437  | 0.113853308 | 0.770504587  | 0.324199621  |
| SDPG_04007780467 | X13.AAHLA    | 4-7780467-8821996     | 8.29E-05 | 0.046549713 | 0.524520465  | 4.658116847  | 0.112603544 | 0.745223411  | 0.303817519  |
| SDPG_04008906412 | X13.AAHLA    | 4-8906412-8940940     | 5.59E-05 | 0.046549713 | 0.547352104  | 4.807520437  | 0.113853308 | 0.770504587  | 0.324199621  |
| SDPG_04013806614 | X13.AAHLA    | 4-13806614-14635595   | 2.17E-04 | 0.091502059 | 0.50084549   | 4.292626971  | 0.116675754 | 0.729529969  | 0.272161012  |

FDR < 0.1

Upper Confidence Interval 95% = beta + 1.96 \* beta\_standard\_error

Lower Confidence interval 95% = beta - 1.96 \* beta\_standard\_error



## SUPPLEMENTARY DATA

**Supplementary Table S3.** Gene names, symbols, abbreviations and qPCR primer sequences.

| <i>Rat</i>                                  |              |                             |                           |
|---------------------------------------------|--------------|-----------------------------|---------------------------|
| Gene Name                                   | Gene Symbol  | Forward primer              | Reverse primer            |
| Peroxisredoxin 6                            | Prdx6        | GCTGGCGCAGCAGTTGCAG         | CAGTTGACTGGAAGAAGGGAGAGAG |
| Microsomal Glutathione S-Transferase 1      | Mgst 1       | GCCAATGAAACCCAGGCTTCACAC    | CCATCCACAGGCTCTACCCCTTTGT |
| Microsomal glutathione S-transferase 3      | Mgst 3       | TCCCGTTCCTCAGTGGCAGGA       | GGCTACTACACGGGAGACCCTAGC  |
| Solute carrier family 2 member 4            | Glut 4       | GGGTTTCCAGTATGTTGCGGATGC    | CCGGCCTCTGGTTTCAGGCA      |
| MLX interacting protein-like                | ChREBP total | CTTGAAACCTTCACCAGG          | TACTGTTCCCTGCCTGCTC       |
|                                             | ChREBP alpha | AGGCTCAAGCATTCTGAAGAG       | TGCATCGATCACAGGTCATT      |
|                                             | ChREBP beta  | CTTGTCGCCGCATAGCAAC         | TCTGCAGATCGCGCGGAG        |
| ATP citrate lyase                           | Acly         | CCAGGCCAGCCATAACGG          | GGAGTATGGGCTTCATCGGGCA    |
| Acetyl-CoA carboxylase alpha                | Acc1         | TGCCAGTCGCTCAGCCAAG         | CGGGAAAGCAGGGGATCCGT      |
| Fatty acid synthase                         | Fasn         | TCCCATCACACCTGGGACA         | CTGGACCGCCGTGACCTGAG      |
| Peptidylprolyl isomerase A (cyclophilin A)  | Ppia         | AGCATACAGTCTGGCAT           | TCACCTTCCCAAAGACCAC       |
| <i>Murine</i>                               |              |                             |                           |
| Gene Name                                   | Gene Symbol  | Forward primer              | Reverse primer            |
| Peroxisredoxin 6                            | Prdx6        | TCGGAGAGGGTGGGAACCTACC      | CAGTTGACTGGAAGAAGGGAGAGAG |
| Microsomal Glutathione S-Transferase 1      | Mgst 1       | CCTGTTTGCTGAGGAAGGGGA       | TGCGCAGAGCCCACCTGAATGA    |
| Microsomal glutathione S-transferase 3      | Mgst 3       | ACACGGTGGTGCCCATCAGG        | GGCTACTACACAGGAGACCCTAGCA |
| Nuclear factor, erythroid derived 2, like 2 | Nfe2l2       | AAGGTCCATCTCCCGAACC         | CTGAAAAGCGGCTCAGCACC      |
| MLX interacting protein-like                | Mlxip1       | ATCTTGGTCTTAGGGTCTTCAGG     | CACTCAGGGAATACAGCGCTAC    |
| Actin, beta                                 | Actb         | GAACCCTAAGGCCAACCCTGAAAAGAT | ACCGCTCGTTGCCAATAGTGATG   |

## Methods

## References:

1. Kuda O, Brezinova M, Rombaldova M, Slavikova B, Posta M, Beier P, Janovska P, Veleba J, Kopecky J, Jr., Kudova E, Pelikanova T, Kopecky J: Docosahexaenoic Acid-Derived Fatty Acid Esters of Hydroxy Fatty Acids (FAHFAs) With Anti-inflammatory Properties. *Diabetes* 2016;65:2580-2590
2. Brezinova M, Kuda O, Hansikova J, Rombaldova M, Balas L, Bardova K, Durand T, Rossmeisl M, Cerna M, Stranak Z, Kopecky J: Levels of palmitic acid ester of hydroxystearic acid (PAHSA) are reduced in the breast milk of obese mothers. *Biochim Biophys Acta* 2017;1863:126-131
3. Aitman TJ, Gotoda T, Evans AL, Imrie H, Heath KE, Trembling PM, Truman H, Wallace CA, Rahman A, Dore C, Flint J, Kren V, Zidek V, Kurtz TW, Pravenec M, Scott J: Quantitative trait loci for cellular defects in glucose and fatty acid metabolism in hypertensive rats. *Nat Genet* 1997;16:197-201
